# Supplementary material
Source: Springer Nature journal article supplement (https://www.springermedizin.de/resource/supplementary/12879_2012_2093_MOESM1_ESM.pdf/9443558)
Supplement: MOESM1 [file 9443558]

## Phase 1

- VAP bundle alone

## Phase 2

- VAP bundle +
- Oral decontamination with chlorhexidine 0.12%

## Phase 3

- VAP bundle +
- Oral decontamination with chlorhexidine 0.12% +
- Continuous aspiration of subglottic secretions (CASS)
